# Supplementary material for: Prospective Association between Total and Trimester-Specific Gestational Weight Gain Rate and Physical Growth Status in Children within 24 Months after Birth
Source: MDPI journal article supplement (doi:10.3390/nu15214523), 2023-10-25
Supplement: s1 [file s1]

Table S2. Characteristics of the included and excluded populations [Mean  $\pm$  SD or n (%)].

| Variables                              | Subjects<br>included in this<br>analyses<br>(n=3229) | Subjects<br>excluded in<br>this analyses<br>(n=1714) | P-Value |
|----------------------------------------|------------------------------------------------------|------------------------------------------------------|---------|
| <b>Maternal characteristics</b>        |                                                      |                                                      |         |
| Age at delivery (years)                | 28.93 $\pm$ 4.09                                     | 28.72 $\pm$ 4.06                                     | 0.871   |
| Education level                        |                                                      |                                                      | 0.361   |
| Middle school and below                | 285 (8.82)                                           | 150 (8.76)                                           |         |
| High school or same level              | 410 (12.70)                                          | 223 (13.00)                                          |         |
| Junior college or same level           | 1081 (33.48)                                         | 592 (34.56)                                          |         |
| College and above                      | 1453 (45.00)                                         | 749 (43.68)                                          |         |
| Annual family income                   |                                                      |                                                      | 0.386   |
| < ¥100,000                             | 771 (23.88)                                          | 416 (24.28)                                          |         |
| ¥100,000-200,000                       | 1551 (48.03)                                         | 828 (48.32)                                          |         |
| ¥200,000-300,000                       | 600 (18.58)                                          | 315 (18.39)                                          |         |
| $\geq$ ¥300,000                        | 307 (9.51)                                           | 154 (9.01)                                           |         |
| Second-hand smoking during pregnancy   |                                                      |                                                      | 0.337   |
| Yes                                    | 781 (24.19)                                          | 401 (23.40)                                          |         |
| No                                     | 2448 (75.81)                                         | 1277 (74.51)                                         |         |
| Alcohol before pregnancy               | 74 (2.29)                                            | 36 (2.09)                                            |         |
| Sleep quality during pregnancy         |                                                      |                                                      | 0.362   |
| Good                                   | 1099 (34.04)                                         | 611 (35.62)                                          |         |
| Poor                                   | 2130 (65.96)                                         | 1103 (64.38)                                         |         |
| Physical activity intensity            |                                                      |                                                      | 0.154   |
| Low                                    | 1327 (41.10)                                         | 697 (40.65)                                          |         |
| Medium                                 | 1743 (53.98)                                         | 924 (53.93)                                          |         |
| High                                   | 159 (4.92)                                           | 93 (5.42)                                            |         |
| Depression during pregnancy            | 366 (11.33)                                          | 187 (10.91)                                          | 0.578   |
| Anxiety during pregnancy               | 401 (12.42)                                          | 225 (13.15)                                          | 0.611   |
| Parity                                 |                                                      |                                                      | 0.123   |
| Primiparous                            | 1803 (55.84)                                         | 960 (56.01)                                          |         |
| Non-primiparous                        | 1426 (44.16)                                         | 754 (43.99)                                          |         |
| Pre-pregnancy BMI (kg/m <sup>2</sup> ) |                                                      |                                                      | 0.412   |
| < 18.5                                 | 543 (16.82)                                          | 293 (17.12)                                          |         |
| 18.5-24                                | 2170 (67.20)                                         | 1164 (67.89)                                         |         |
| $\geq$ 24                              | 516 (15.98)                                          | 257 (14.99)                                          |         |
| Gestational Diabetes                   | 345(10.68)                                           | 172 (10.01)                                          | 0.144   |
| <b>Paternal characteristics</b>        |                                                      |                                                      |         |
| Age (years)                            | 29.97 $\pm$ 4.62                                     | 29.63 $\pm$ 4.53                                     | 0.779   |
| FBMI category (kg/m <sup>2</sup> )     |                                                      |                                                      | 0.414   |
| < 18.5                                 | 140 (4.34)                                           | 71 (4.12)                                            |         |
| 18.5-24                                | 1615 (50.02)                                         | 860 (50.17)                                          |         |
| $\geq$ 24                              | 1474 (45.64)                                         | 783 (45.71)                                          |         |

**Children's characteristics**

|     |  |  |       |
|-----|--|--|-------|
| Sex |  |  | 0.376 |
|-----|--|--|-------|

|      |              |             |  |
|------|--------------|-------------|--|
| Male | 1651 (51.13) | 892 (52.04) |  |
|------|--------------|-------------|--|

|        |              |             |  |
|--------|--------------|-------------|--|
| Female | 1578 (48.87) | 882 (47.96) |  |
|--------|--------------|-------------|--|

---
