# Supplementary material for: Prospective Association between Total and Trimester-Specific Gestational Weight Gain Rate and Physical Growth Status in Children within 24 Months after Birth
Source: MDPI journal article supplement (doi:10.3390/nu15214523), 2023-10-25
Supplement: s1 [file s1]

Table S1. Characteristics of participants during the period of the enrollment in Shanghai Maternal-Child Pairs Cohort (n=6714).

| Characteristics                        | Mean $\pm$ SD or n (%) |
|----------------------------------------|------------------------|
| <b>Maternal characteristics</b>        |                        |
| District                               |                        |
| Pu dong                                | 2963 (44.13)           |
| Songjiang                              | 3751 (55.87)           |
| Age (ages)                             | 28.89 $\pm$ 4.17       |
| Education level                        |                        |
| Middle school and below                | 794 (11.83)            |
| High school or same level              | 934 (13.91)            |
| Junior college or same level           | 2213 (32.96)           |
| College and above                      | 2773 (41.30)           |
| Race                                   |                        |
| The Han nationality                    | 6610 (98.45)           |
| Other                                  | 104 (1.55)             |
| Annual family income                   |                        |
| < ¥100,000                             | 1794 (26.71)           |
| ¥100,000-200,000                       | 3066 (45.67)           |
| ¥200,000-300,000                       | 1217 (18.13)           |
| $\geq$ ¥300,000                        | 637 (9.49)             |
| Pre-pregnancy BMI (kg/m <sup>2</sup> ) |                        |
| < 18.5                                 | 1081 (16.10)           |
| 18.5-24                                | 4525 (67.40)           |
| $\geq$ 24                              | 1108 (16.50)           |
| <b>Paternal characteristics</b>        |                        |
| Age (years)                            | 29.95 $\pm$ 4.71       |
| FBMI category (kg/m <sup>2</sup> )     |                        |
| < 18.5                                 | 291 (4.33)             |
| 18.5-24                                | 3403 (50.69)           |
| $\geq$ 24                              | 3020 (44.98)           |
